# Supplementary material for: Effects of Different Stress Parameters on Growth and on Oleuropein-Degrading Abilities of Lactiplantibacillus plantarum Strains Selected as Tailored Starter Cultures for Naturally Table Olives
Source: PubMed Central journal article supplement (PMC7590217; doi:10.3390/microorganisms8101607), 2020-10-19
Supplement: microorganisms-08-01607-s001.pdf [file microorganisms-08-01607-s001.pdf]

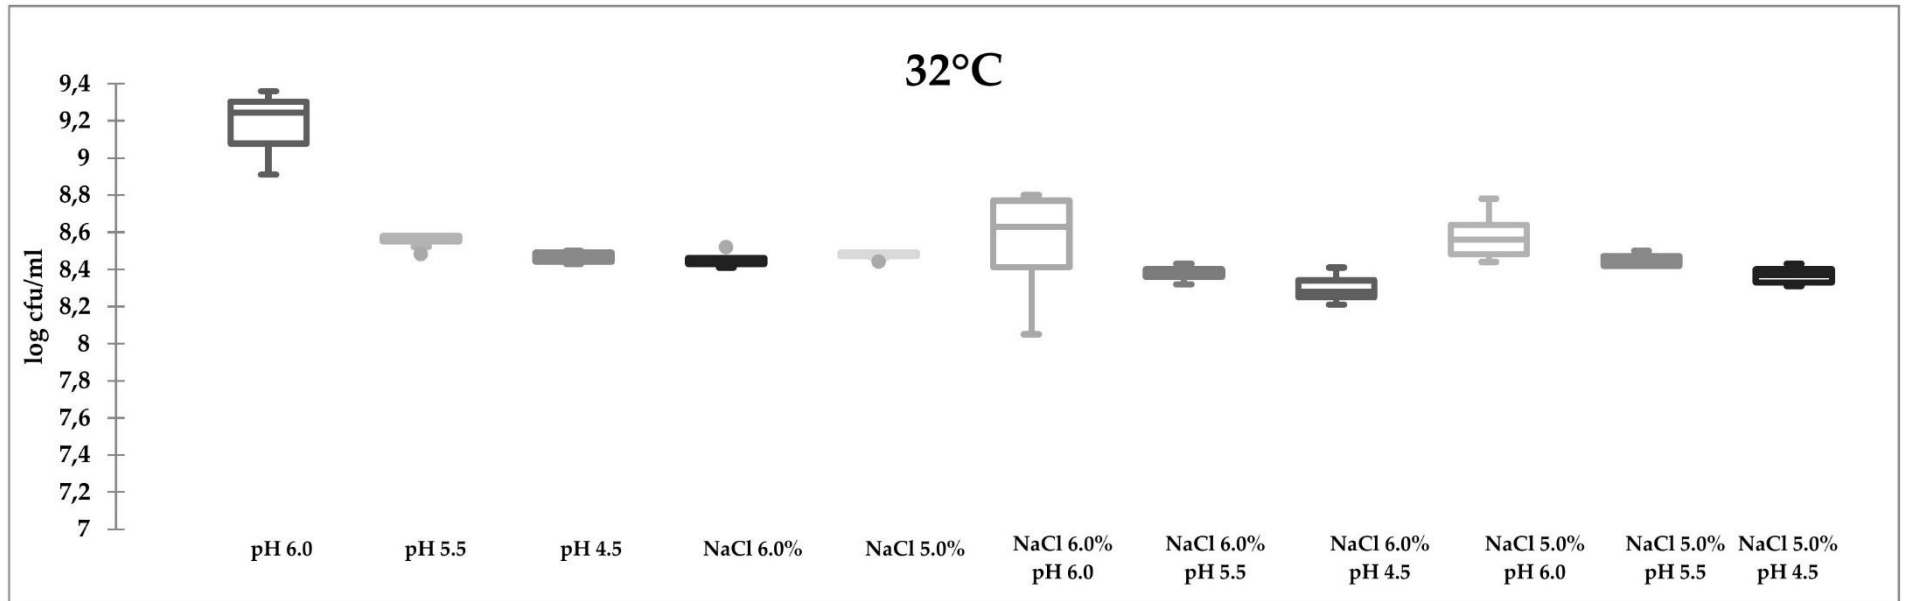

**Figure S1:** Box plot of cell density (expressed as log CFU/mL) of *L. plantarum* strains, at different pH and salt conditions at 32 °C.

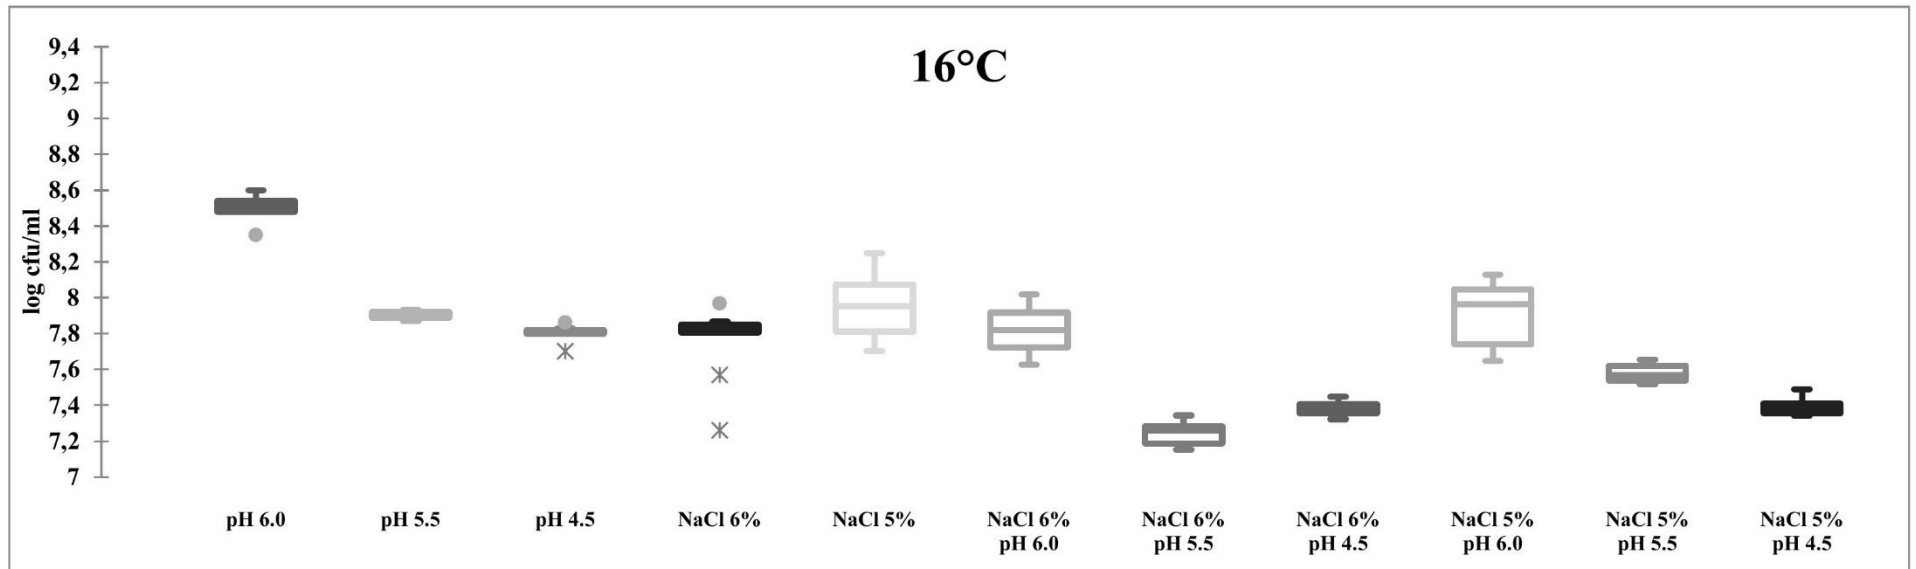

**Figure S2:** Box plot of cell density (expressed as log CFU/mL) of *L. plantarum* strains, at different pH and salt conditions at 16 °C

**Supplementary Table 1.** Viable counts (log CFU/mL) of *L. plantarum* strains at different stress conditions, incubated at 32°C. All strains, as reported in the text, were inoculated at initial cell density of 7 log CFU/mL.

| <i>L. plantarum</i><br>strains |                           |                          |                          | NaCl 6.0%                |                          |                           | NaCl 5.0%                |                         |                         |                          |                         |
|--------------------------------|---------------------------|--------------------------|--------------------------|--------------------------|--------------------------|---------------------------|--------------------------|-------------------------|-------------------------|--------------------------|-------------------------|
|                                | pH 6.0                    | pH 5.5                   | pH 4.5                   | NaCl 6.0%                | NaCl 5.0%                | pH 6.0                    | pH 5.5                   | pH 4.5                  | pH 6.0                  | pH 5.5                   | pH 4.5                  |
| F1.8M                          | 9.30±0.07 <sup>aAB</sup>  | 8.52±0.10 <sup>bc</sup>  | 8.47±0.06 <sup>bc</sup>  | 8.46±0.05 <sup>bc</sup>  | 8.49±0.06 <sup>bc</sup>  | 8.63±0.19 <sup>bAB</sup>  | 8.40±0.07 <sup>bc</sup>  | 8.25±0.07 <sup>c</sup>  | 8.44±0.13 <sup>bc</sup> | 8.47±0.05 <sup>bc</sup>  | 8.40±0.06 <sup>bc</sup> |
| F1.10                          | 9.34±0.12 <sup>aA</sup>   | 8.58±0.06 <sup>b</sup>   | 8.50±0.10 <sup>b</sup>   | 8.46±0.07 <sup>bc</sup>  | 8.49±0.06 <sup>b</sup>   | 8.05±0.11 <sup>dC</sup>   | 8.32±0.09 <sup>bcd</sup> | 8.21±0.12 <sup>cd</sup> | 8.48±0.11 <sup>bc</sup> | 8.45±0.06 <sup>bc</sup>  | 8.33±0.11 <sup>bc</sup> |
| F1.16                          | 8.91±0.06 <sup>aD</sup>   | 8.48±0.07 <sup>ab</sup>  | 8.48±0.07 <sup>ab</sup>  | 8.52±0.09 <sup>ab</sup>  | 8.48±0.06 <sup>ab</sup>  | 8.41±0.12 <sup>bABC</sup> | 8.36±0.06 <sup>b</sup>   | 8.28±0.14 <sup>b</sup>  | 8.55±0.20 <sup>ab</sup> | 8.45±0.06 <sup>ab</sup>  | 8.37±0.06 <sup>b</sup>  |
| F3.2                           | 9.24±0.06 <sup>aAB</sup>  | 8.56±0.05 <sup>bc</sup>  | 8.49±0.08 <sup>c</sup>   | 8.46±0.07 <sup>c</sup>   | 8.49±0.05 <sup>c</sup>   | 8.77±0.19 <sup>bAB</sup>  | 8.43±0.06 <sup>c</sup>   | 8.40±0.07 <sup>c</sup>  | 8.58±0.09 <sup>bc</sup> | 8.50±0.05 <sup>c</sup>   | 8.43±0.07 <sup>c</sup>  |
| F3.5                           | 9.23±0.13 <sup>aABC</sup> | 8.55±0.07 <sup>b</sup>   | 8.43±0.08 <sup>b</sup>   | 8.46±0.06 <sup>b</sup>   | 8.49±0.05 <sup>b</sup>   | 8.62±0.26 <sup>bAB</sup>  | 8.43±0.12 <sup>b</sup>   | 8.41±0.06 <sup>b</sup>  | 8.64±0.20 <sup>b</sup>  | 8.50±0.05 <sup>b</sup>   | 8.42±0.13 <sup>b</sup>  |
| F3.6                           | 9.08±0.06 <sup>aBCD</sup> | 8.56±0.06 <sup>bc</sup>  | 8.44±0.07 <sup>bcd</sup> | 8.41±0.07 <sup>bcd</sup> | 8.46±0.08 <sup>bcd</sup> | 8.34±0.11 <sup>cBC</sup>  | 8.37±0.05 <sup>cd</sup>  | 8.29±0.07 <sup>d</sup>  | 8.65±0.14 <sup>b</sup>  | 8.42±0.06 <sup>bcd</sup> | 8.31±0.09 <sup>d</sup>  |
| F3.7                           | 9.36±0.10 <sup>aA</sup>   | 8.58±0.06 <sup>bcd</sup> | 8.49±0.09 <sup>cde</sup> | 8.43±0.07 <sup>cde</sup> | 8.47±0.07 <sup>cde</sup> | 8.67±0.12 <sup>bcAB</sup> | 8.37±0.08 <sup>de</sup>  | 8.25±0.1 <sup>e</sup>   | 8.78±0.11 <sup>b</sup>  | 8.42±0.06 <sup>cde</sup> | 8.32±0.09 <sup>de</sup> |
| F3.8                           | 8.99±0.08 <sup>aCD</sup>  | 8.56±0.06 <sup>bc</sup>  | 8.47±0.07 <sup>cd</sup>  | 8.41±0.06 <sup>cd</sup>  | 8.44±0.08 <sup>cd</sup>  | 8.77±0.15 <sup>abAB</sup> | 8.36±0.07 <sup>cd</sup>  | 8.28±0.07 <sup>d</sup>  | 8.56±0.16 <sup>bc</sup> | 8.42±0.06 <sup>cd</sup>  | 8.34±0.09 <sup>cd</sup> |
| C11C8                          | 9.30±0.10 <sup>aAB</sup>  | 8.58±0.07 <sup>bc</sup>  | 8.44±0.09 <sup>c</sup>   | 8.45±0.06 <sup>b</sup>   | 8.49±0.05 <sup>b</sup>   | 8.80±0.05 <sup>bA</sup>   | 8.39±0.12 <sup>b</sup>   | 8.34±0.06 <sup>b</sup>  | 8.46±0.15 <sup>b</sup>  | 8.47±0.06 <sup>b</sup>   | 8.40±0.10 <sup>b</sup>  |

a-e: different lowercase letters within the same line indicate significant differences at  $P < 0.05$ ; A-D: different capital letters within the same column indicate significant differences at  $P < 0.05$ .

**Supplementary Table 2.** Viable counts (log CFU/mL) of *L. plantarum* strains at different stress conditions, incubated at 16°C. All strains, as reported in the text, were inoculated at initial cell density of 7 log CFU/mL.

| <i>L. plantarum</i><br>strains | NaCl 6.0%              |                         |                         |                           |                            | NaCl 5.0%                  |                        |                         |                           |                         |                         |
|--------------------------------|------------------------|-------------------------|-------------------------|---------------------------|----------------------------|----------------------------|------------------------|-------------------------|---------------------------|-------------------------|-------------------------|
|                                | pH 6.0                 | pH 5.5                  | pH 4.5                  | NaCl 6.0%                 | NaCl 5.0%                  | pH 6.0                     | pH 5.5                 | pH 4.5                  | pH 6.0                    | pH 5.5                  | pH 4.5                  |
| F1.8M                          | 8.54±0.12 <sup>a</sup> | 7.92±0.05 <sup>b</sup>  | 7.86±0.06 <sup>b</sup>  | 7.81±0.12 <sup>bB</sup>   | 7.91±0.07 <sup>bBCD</sup>  | 7.92±0.07 <sup>bAB</sup>   | 7.15±0.08 <sup>d</sup> | 7.32±0.09 <sup>cd</sup> | 8.05±0.10 <sup>bBC</sup>  | 7.53±0.05 <sup>c</sup>  | 7.36±0.06 <sup>cd</sup> |
| F1.10                          | 8.48±0.06 <sup>a</sup> | 7.88±0.05 <sup>b</sup>  | 7.83±0.06 <sup>b</sup>  | 7.57±0.10 <sup>cdBC</sup> | 7.76±0.07 <sup>bcD</sup>   | 7.72±0.12 <sup>bcBC</sup>  | 7.18±0.1 <sup>e</sup>  | 7.36±0.08 <sup>de</sup> | 7.74±0.05 <sup>bcDE</sup> | 7.56±0.05 <sup>dc</sup> | 7.38±0.07 <sup>de</sup> |
| F1.16                          | 8.60±0.05 <sup>a</sup> | 7.90±0.05 <sup>b</sup>  | 7.70±0.05 <sup>cd</sup> | 7.85±0.06 <sup>bcB</sup>  | 7.70±0.05 <sup>cdD</sup>   | 7.69±0.15 <sup>cdBC</sup>  | 7.34±0.09 <sup>f</sup> | 7.45±0.06 <sup>f</sup>  | 7.65±0.10 <sup>edE</sup>  | 7.63±0.06 <sup>ef</sup> | 7.49±0.06 <sup>ef</sup> |
| F3.2                           | 8.35±0.20 <sup>a</sup> | 7.90±0.05 <sup>bc</sup> | 7.81±0.06 <sup>bc</sup> | 7.83±0.11 <sup>bcB</sup>  | 8.07±0.09 <sup>bABCD</sup> | 7.83±0.06 <sup>bcABC</sup> | 7.28±0.07 <sup>e</sup> | 7.36±0.09 <sup>e</sup>  | 7.89±0.05 <sup>bcCD</sup> | 7.65±0.05 <sup>dc</sup> | 7.43±0.09 <sup>de</sup> |
| F3.5                           | 8.51±0.11 <sup>a</sup> | 7.90±0.05 <sup>b</sup>  | 7.80±0.06 <sup>bc</sup> | 8.25±0.07 <sup>aA</sup>   | 8.37±0.07 <sup>aA</sup>    | 7.70±0.14 <sup>bcBC</sup>  | 7.34±0.09 <sup>d</sup> | 7.38±0.07 <sup>d</sup>  | 8.37±0.09 <sup>aA</sup>   | 7.62±0.05 <sup>c</sup>  | 7.38±0.07 <sup>d</sup>  |
| F3.6                           | 8.48±0.06 <sup>a</sup> | 7.87±0.06 <sup>c</sup>  | 7.80±0.05 <sup>c</sup>  | 7.81±0.06 <sup>cB</sup>   | 8.25±0.05 <sup>bAB</sup>   | 7.82±0.07 <sup>cABC</sup>  | 7.28±0.08 <sup>e</sup> | 7.38±0.07 <sup>e</sup>  | 8.13±0.06 <sup>bB</sup>   | 7.57±0.06 <sup>d</sup>  | 7.40±0.07 <sup>de</sup> |
| F3.7                           | 8.51±0.14 <sup>a</sup> | 7.93±0.04 <sup>b</sup>  | 7.8±0.07 <sup>bc</sup>  | 7.26±0.12 <sup>fC</sup>   | 7.81±0.07 <sup>bcCD</sup>  | 7.76±0.07 <sup>bcBC</sup>  | 7.19±0.10 <sup>f</sup> | 7.41±0.06 <sup>ef</sup> | 7.66±0.11 <sup>cdE</sup>  | 7.52±0.05 <sup>de</sup> | 7.41±0.08 <sup>ef</sup> |
| F3.8                           | 8.54±0.13 <sup>a</sup> | 7.89±0.06 <sup>c</sup>  | 7.81±0.07 <sup>cd</sup> | 7.84±0.10 <sup>dcB</sup>  | 8.17±0.06 <sup>bABC</sup>  | 7.63±0.10 <sup>deC</sup>   | 7.20±0.05 <sup>g</sup> | 7.43±0.06 <sup>fg</sup> | 8.05±0.11 <sup>bcBC</sup> | 7.54±0.06 <sup>ef</sup> | 7.34±0.07 <sup>fg</sup> |
| C11C8                          | 8.48±0.12 <sup>a</sup> | 7.92±0.06 <sup>b</sup>  | 7.82±0.08 <sup>b</sup>  | 7.87±0.06 <sup>bB</sup>   | 7.96±0.07 <sup>bBCD</sup>  | 8.00±0.10 <sup>bA</sup>    | 7.26±0.09 <sup>d</sup> | 7.32±0.07 <sup>d</sup>  | 7.96±0.05 <sup>bBC</sup>  | 7.58±0.05 <sup>c</sup>  | 7.34±0.11 <sup>d</sup>  |

a-g: different lowercase letters within the same line indicate significant differences at P < 0.05; A-E different capital letters within the same column indicate significant differences at P < 0.05.
